# Supplementary material
Source: publisher figshare collection journal article supplement (https://frontiersin.figshare.com/ndownloader/files/26200430)

**Supplementary Figure S1**

To establish the effective detection range of the acoustic receivers, in-situ tests were conducted at Shark Reef, the Exuma Cays (24° 25’ N, -76° 41’ W), between 1 May and 30 November 2018. An acoustic receiver grid (VR2W, Vemco®) was established, and a sentinel transmitter (V16-6H, nominal delay 910 s, Vemco®) was attached to a central receiver mooring, secured to the float line 50 cm above the receiver. The grid format positioned receivers at the following fixed distance and depth intervals (*reporting format for each fixed receiver – distance m from sentinel tag (depth m of receiver)*): 0 m (15 m), 170 m (14 m), 170 m (16 m), 175 m (10 m), 190 m (20 m), 275 m (23 m), 290 m (12 m), 350 m (9 m), 470 m (14 m), 540 m (15 m), 670 m (10 m). Detection range was defined as the distance that 50% of sentinel tag transmissions (Figure S1) were recorded throughout the duration of the deployments, based on a logistic regression through the daily detection proportions at each distance parameter, as defined by Kessel at al., (2014).

**Figure S1**. Detection range test results for the acoustic receiver grid at Shark Reef, Exuma Cays. The effective detection range, defined as the distance at which the detection probability is 50 %, was 360 m.


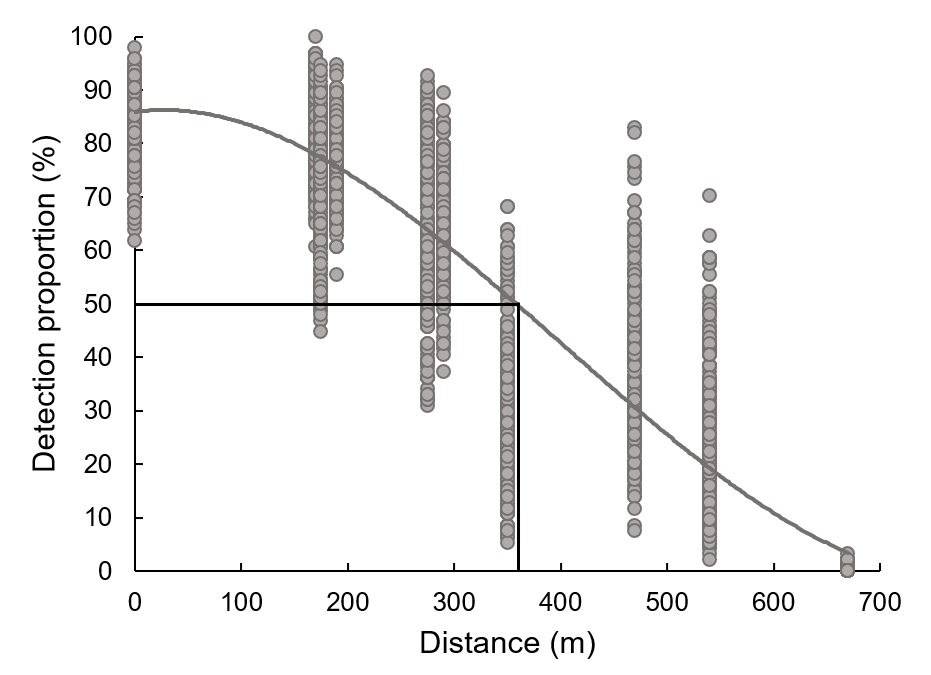

Supplement: Supplementary file 1 [file 26200430]
